# Supplementary material
Source: PubMed Central journal article supplement (PMC5143278)

Extended Data Fig. 6b:

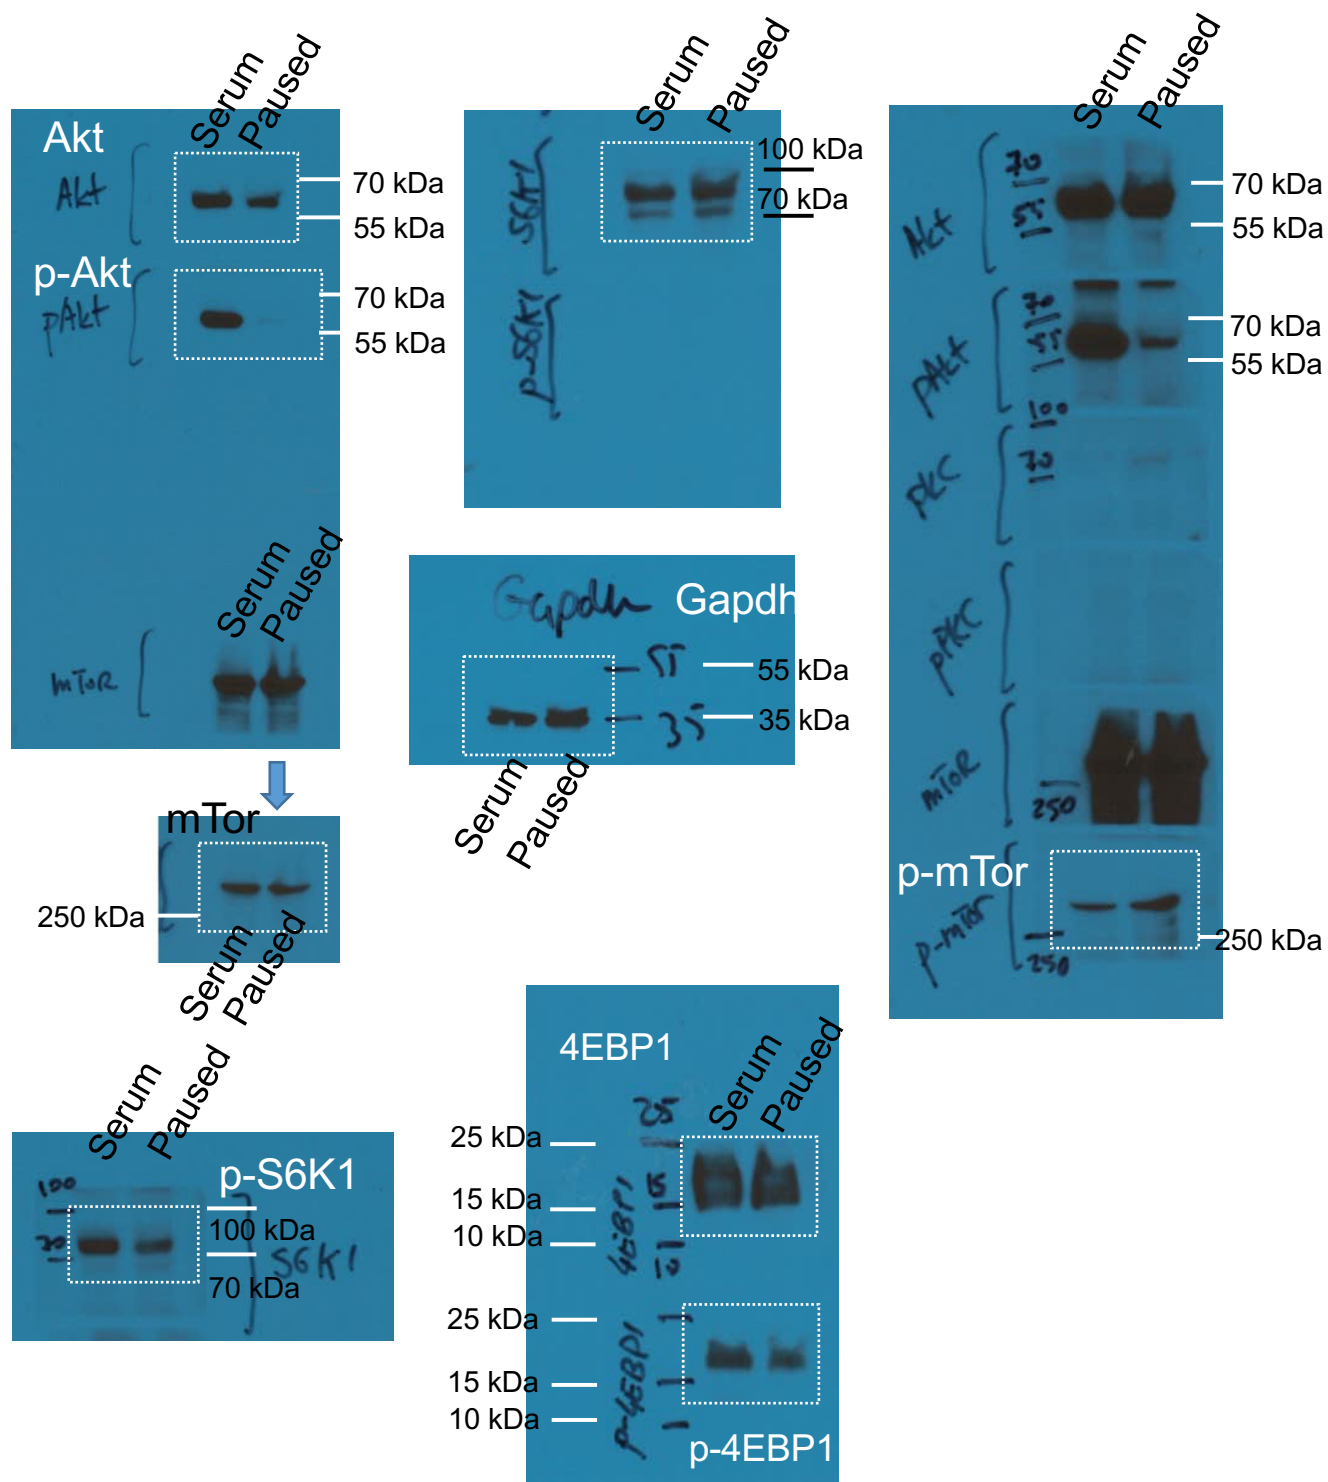

Supplementary Figure 1 Uncropped images with size marker indications

Supplement: NIHMS827222-supplement-supp_fig1.pdf [file NIHMS827222-supplement-supp_fig1.pdf]
